# Supplementary material
Source: PubMed Central journal article supplement (PMC7611476)
Supplement: EMS131646-supplement-Supplementary_information.pdf [file EMS131646-supplement-Supplementary_information.pdf]

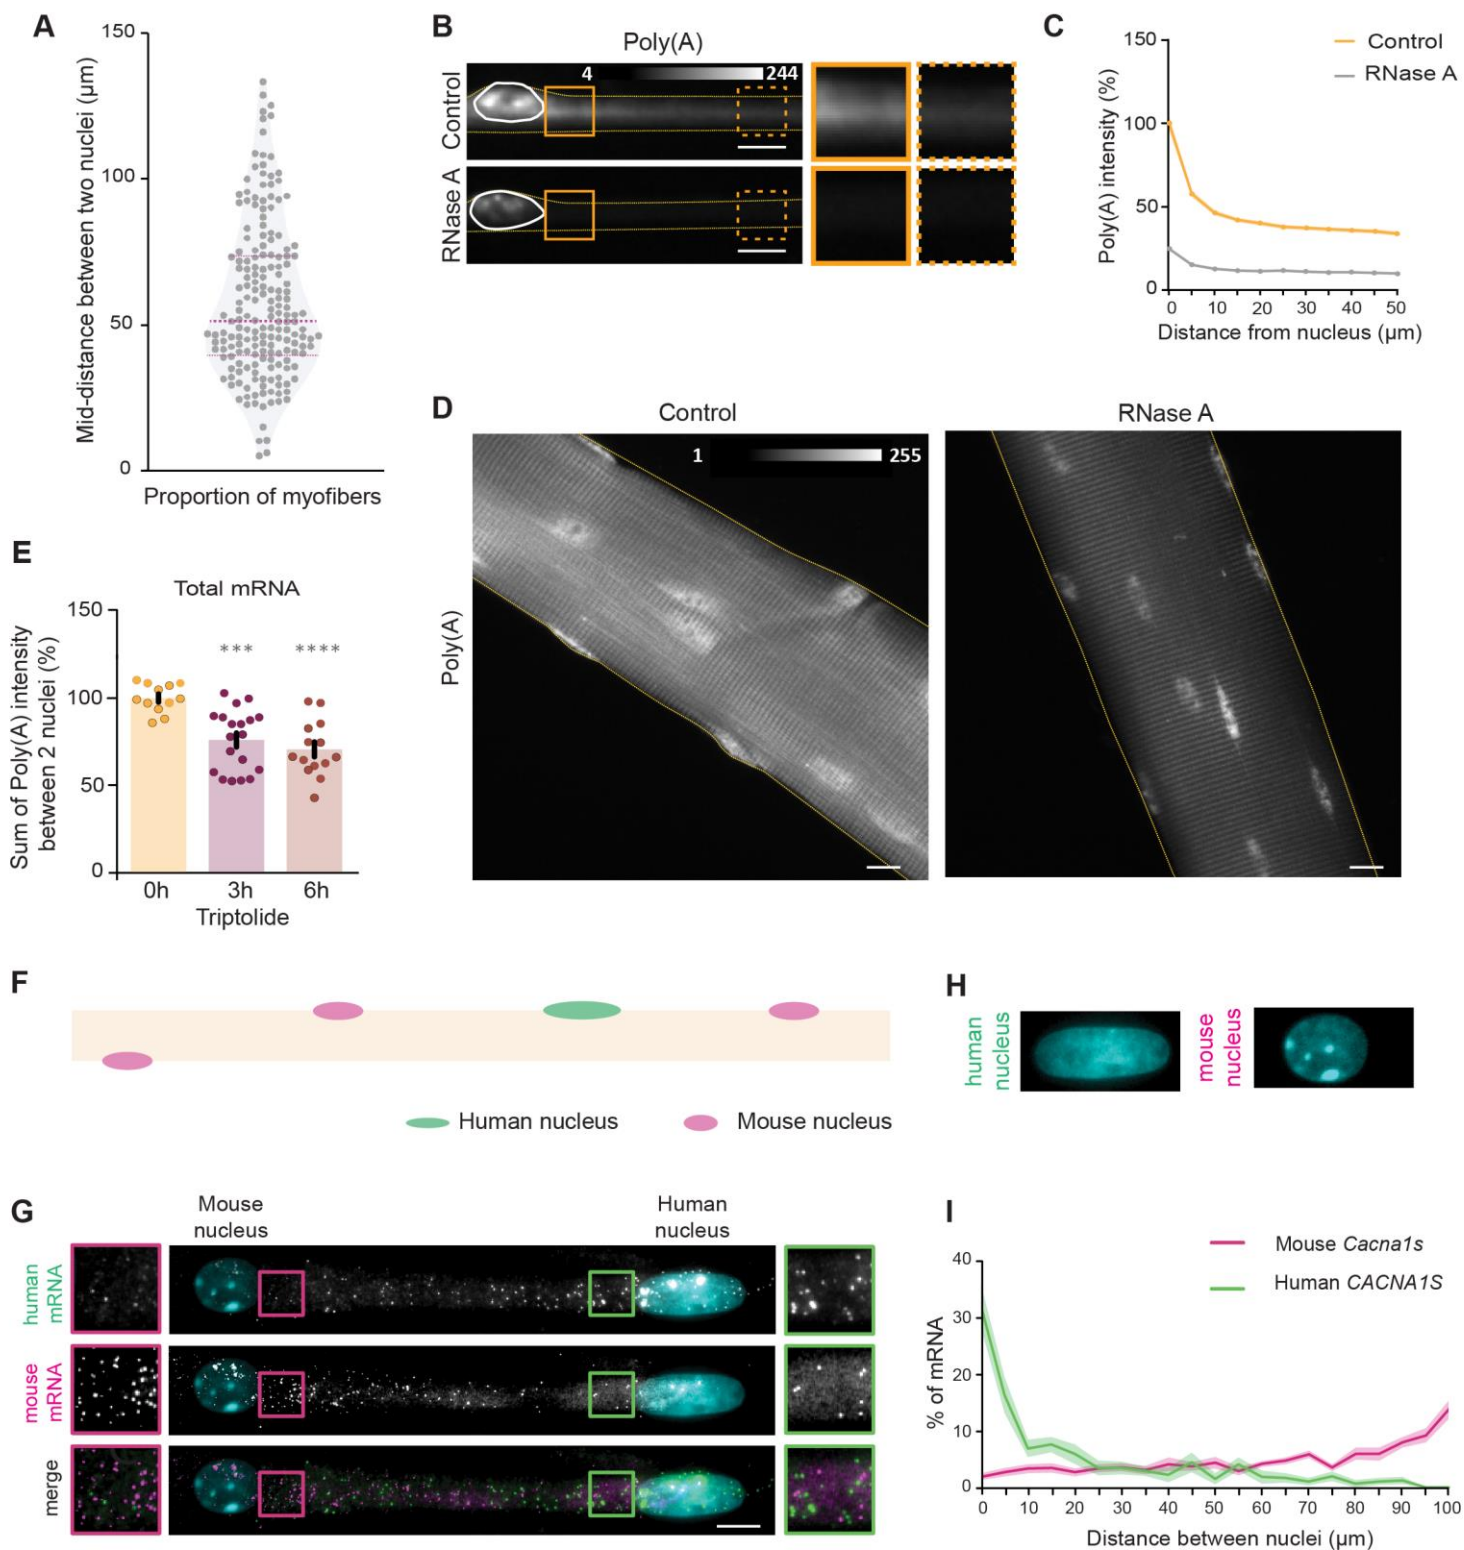

**Fig. S1.** Relative to Fig. 1.

(A) Violin plot representing the distribution of the mid-distance between two adjacent nuclei in *in vitro* myofibers. The width of the shaded area represents the proportion of myofibers by the mid-distance between two nuclei. Dotted lines represent the median and the interquartile range. The distance between two adjacent nuclei was measured in 188 cells from more than 3 independent experiments. (B) Representative FISH image of total mRNA in myofibers treated for 1h with RNase A. (C) Quantification of total mRNA distribution in RNase A-treated myofibers. Mean  $\pm$  SEM of 11 (control) and 11 (RNase treated) cell segments in 2 independent experiments. (D) Representative FISH image of total mRNA in isolated fibers treated for 1h with RNase A. (E) Average of total poly(A) mRNA intensity in SUM projections of segments between two adjacent nuclei in myofibers treated for 3h and 6h with triptolide. Mean  $\pm$  SEM of 12, 19 and 14 cells from 2 independent experiments. (F) Schematic representation of the species mosaic experiment. (G) smFISH image of human and mouse *Cacna1s* mRNA in a segment of a mouse myofiber containing a single human nucleus. (H) Human and mouse nuclei stained with DAPI. (I) Quantification of the percentage of human and mouse *Cacna1s* mRNA from the mouse nucleus to the human nucleus. Mean  $\pm$  SEM of 7 (human mRNA) and 13 (mouse mRNA) cell segments. Shade indicates SEM. (\*\*\*)  $p < 0.001$ , \*\*\*\*  $p < 0.0001$ . One-way ANOVA with Tukey's multiple comparisons test. smFISH images are maximum intensity projections. Scale bars: 10  $\mu$ m.)

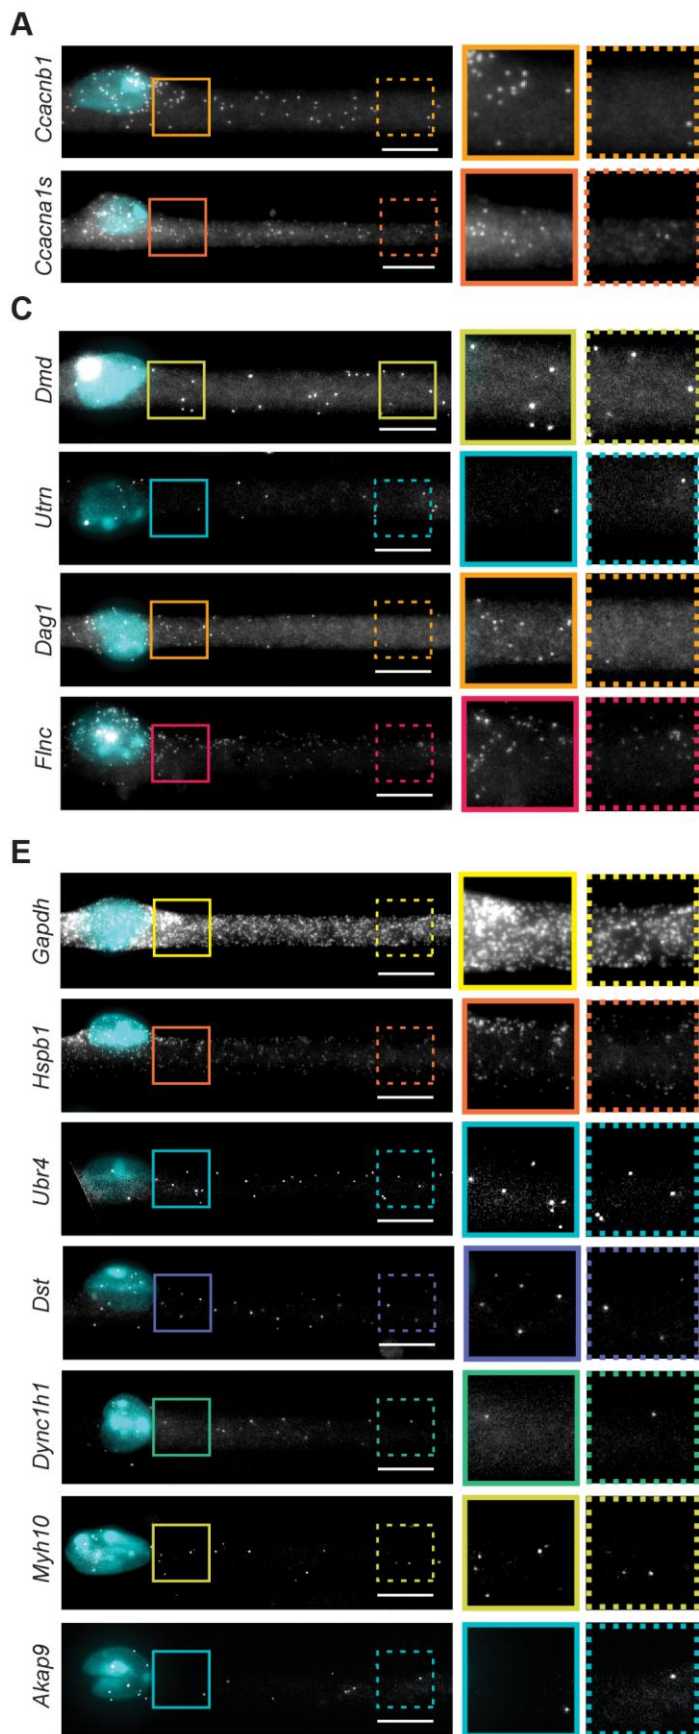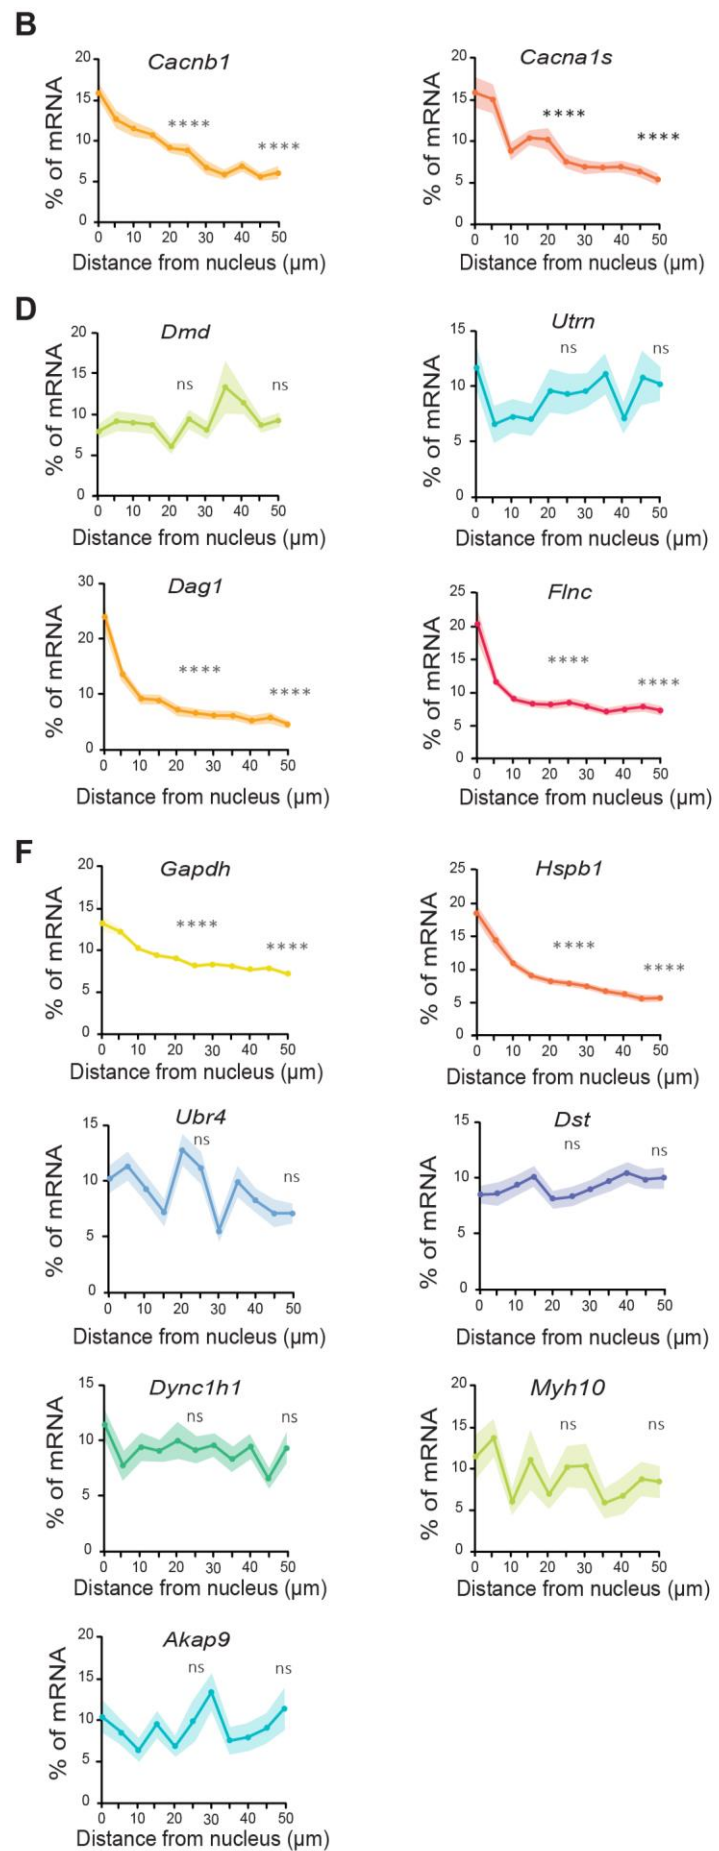

**Fig. S2.** Relative to Fig. 2. (A, C, E) Representative smFISH images of the distribution of *Cacnb1* and *Cacna1s* (A), *Dmd*, *Utrn*, *Dag1* and *Flncl* (C) and *Gapdh*, *Hspb1*, *Ubr4*, *Dst*, *Dync1h1*, *Myh10* and *Akap9* (E) mRNAs. 1.5x magnification of the perinuclear region (undashed) and 50  $\mu\text{m}$  away from the nucleus (dashed) on the right. (B, D, F) Quantification of mRNA amount relative to the distance to the nucleus (5  $\mu\text{m}$  bins), normalized to total mRNA counts in each cell segment. Statistical significance presented at 25 and 50  $\mu\text{m}$  comparing with 0  $\mu\text{m}$ . Mean  $\pm$  SEM of 41 (*Cacnb1*), 34 (*Cacna1s*), 29 (*Dmd*), (*Utrn*), (*Dag1*), (*Flncl*), 45 (*Gapdh*), *Hspb1*, *Ubr4*, *Dst*, *Dync1h1*, *Myh10* and *Akap9* cell segments from 3 to 6 independent experiments. (ns  $p > 0.05$ , \*\*\*\* $p < 0.0001$ , one-way ANOVA with Tukey's multiple comparisons test. Shade indicates SEM. smFISH images are maximum intensity projections. Scale bars: 10  $\mu\text{m}$ .)

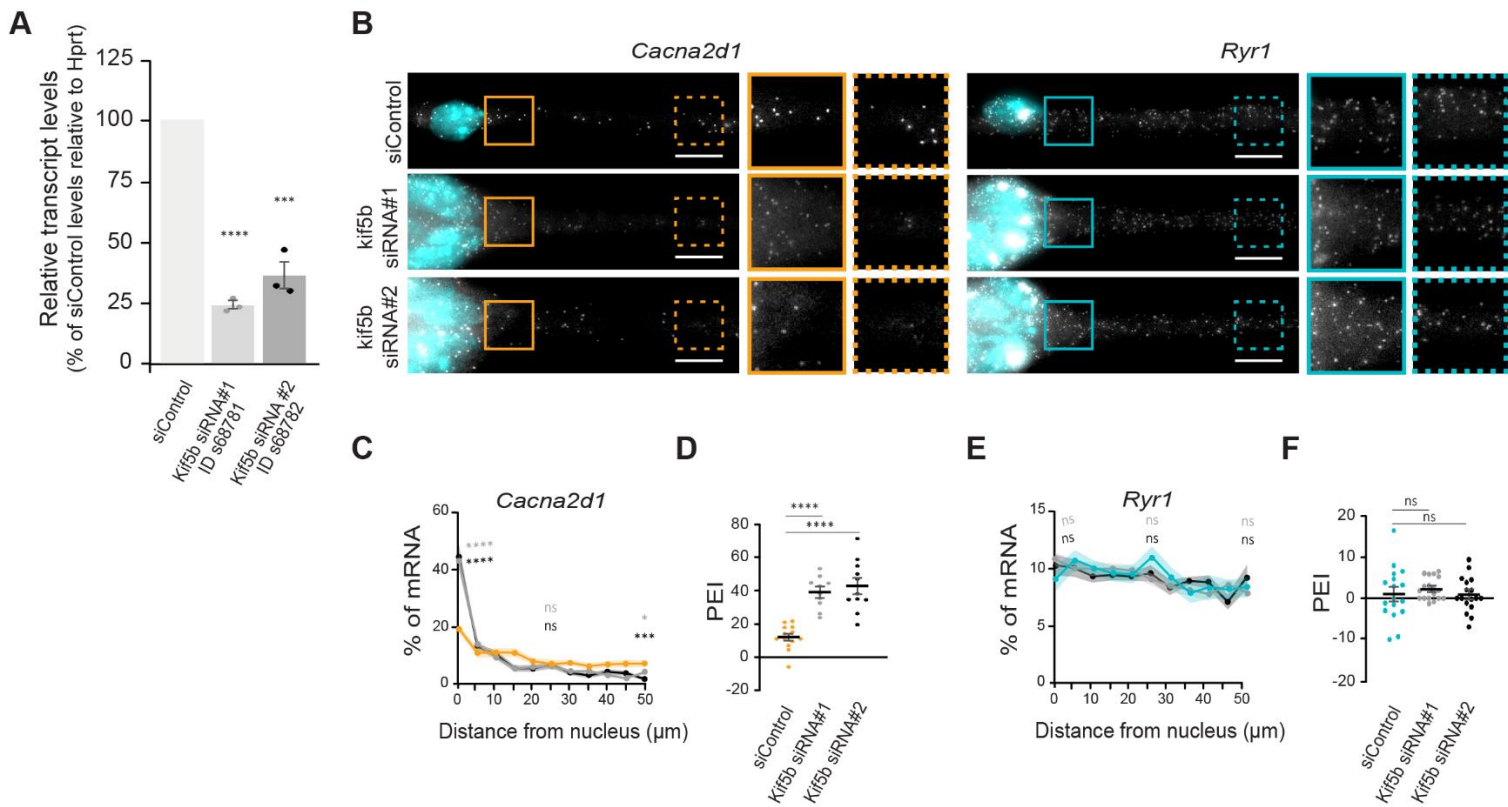

**Fig. S3.** Relative to Fig. 2. (A) Quantification of Kif5b mRNA amount (normalized to Hprt) measured by RT-qPCR in myofibers transfected with Kif5b siRNAs #1 (s68781) and #2 (s68782) relative to control. (B) Representative smFISH image of the distribution of *Cacna2d1* and *Ryr1* mRNAs in control and Kif5b depleted myofibers. Kif5b depletion results in myofibers that exhibit nuclei aggregation. 1.5x magnification of the perinuclear region (undashed) and 50 μm away from the nuclei (dashed) on the right. (C, E) Quantification of *Cacna2d1* and *Ryr1* distribution in control and Kif5b depleted myofibers. (D, F) PEI of *Cacna2d1* and *Ryr1* in control and kif5b depleted myofibers. (ns  $p > 0.05$ , \* $p < 0.05$ , \*\*\* $p < 0.001$ , \*\*\*\* $p < 0.0001$ , one-way ANOVA with Tukey's multiple comparisons test. Shade indicates SEM. smFISH images are maximum intensity projections. Scale bars: 10 μm.)

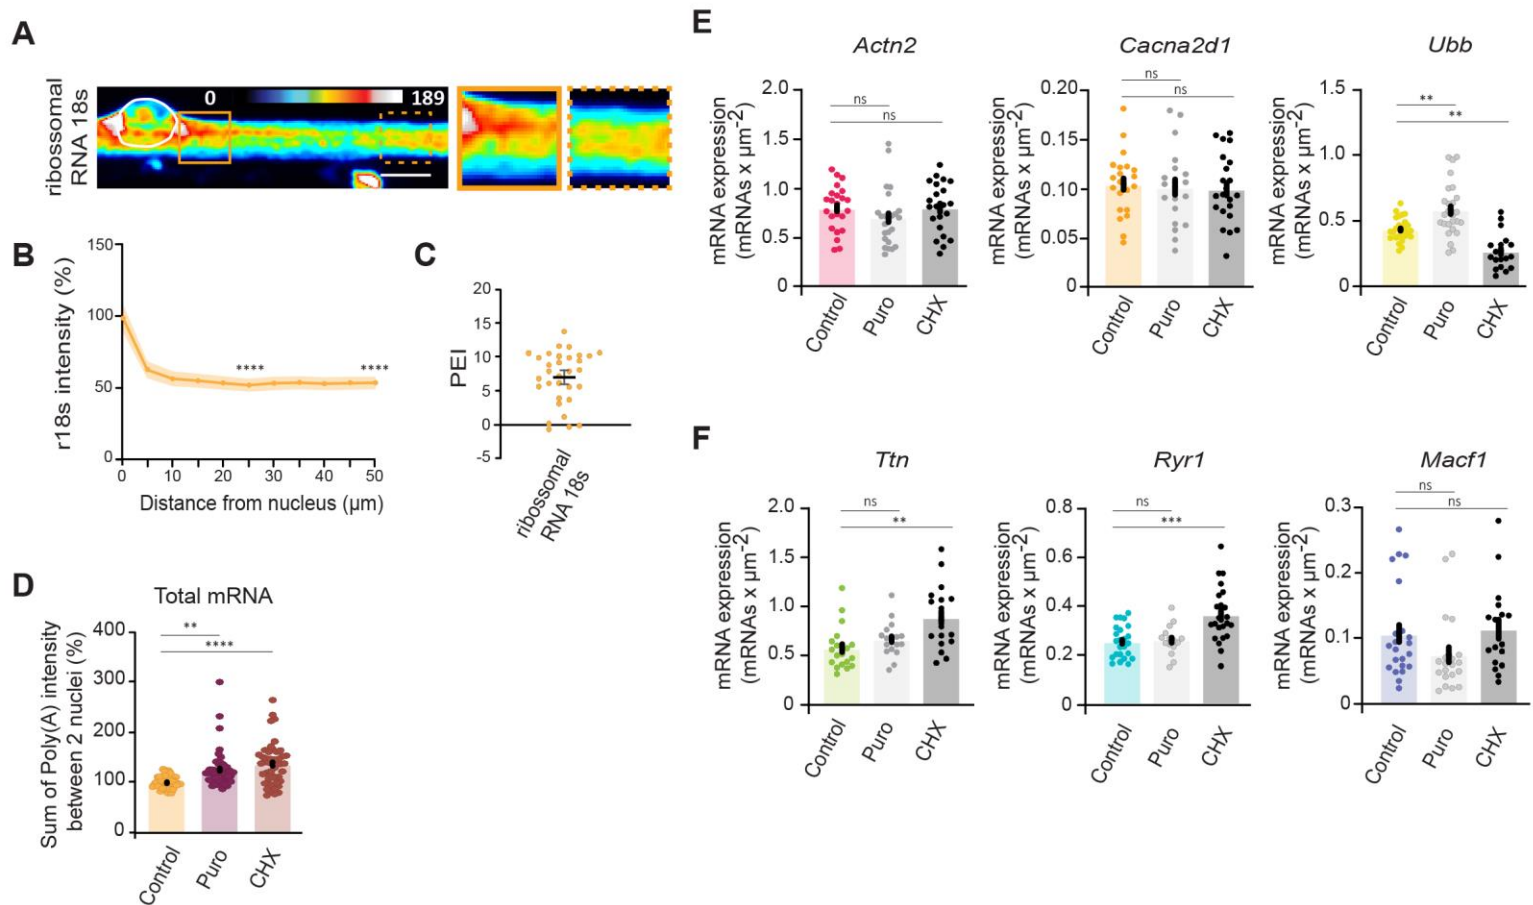

**Fig. S4.** Relative to Fig. 4. (A) Representative FISH image of 18S ribosomal RNA. (B) Quantification of 18S ribosomal RNA distribution. (C) PEI of 18S ribosomal RNA. (D) Quantification of total poly(A) mRNA intensity in segments between two adjacent nuclei in myofibers treated for 6h with puromycin and cycloheximide. Mean  $\pm$  SEM of 40, 48 and 47 cell segments. (E) Quantification of *Actn2*, *Cacna2d1* and *Ubb* mRNA amount measured as number of mRNAs per  $\mu\text{m}^2$  by smFISH in segments of myofibers between two adjacent nuclei in control, cycloheximide and puromycin-treated myofibers. Mean  $\pm$  SEM of 23, 24 and 22 (*Actn2*), 21, 19 and 22 (*Cacna2d1*) and 26, 26 and 19 (*Ubb*) cells from 3 independent experiments. (F) Quantification of *Ttn*, *Ryr1* and *Macf1* mRNA amount measured as number of mRNAs per  $\mu\text{m}^2$  by smFISH in segments of myofibers between two adjacent nuclei in control and cycloheximide and puromycin-treated myofibers. Mean  $\pm$  SEM of 19, 17 and 18 (*Ttn*), 24, 15 and 23 (*Ryr1*) and 22, 20 and 17 (*Macf1*) cells from 3 independent experiments. (ns  $p > 0.05$ , \*\*  $p < 0.01$ , \*\*\*  $p < 0.001$ , \*\*\*\*  $p < 0.0001$ , one-way ANOVA with Tukey's multiple comparisons test. Shade indicates SEM. smFISH images are maximum intensity projections. Scale bars: 10  $\mu\text{m}$ .)

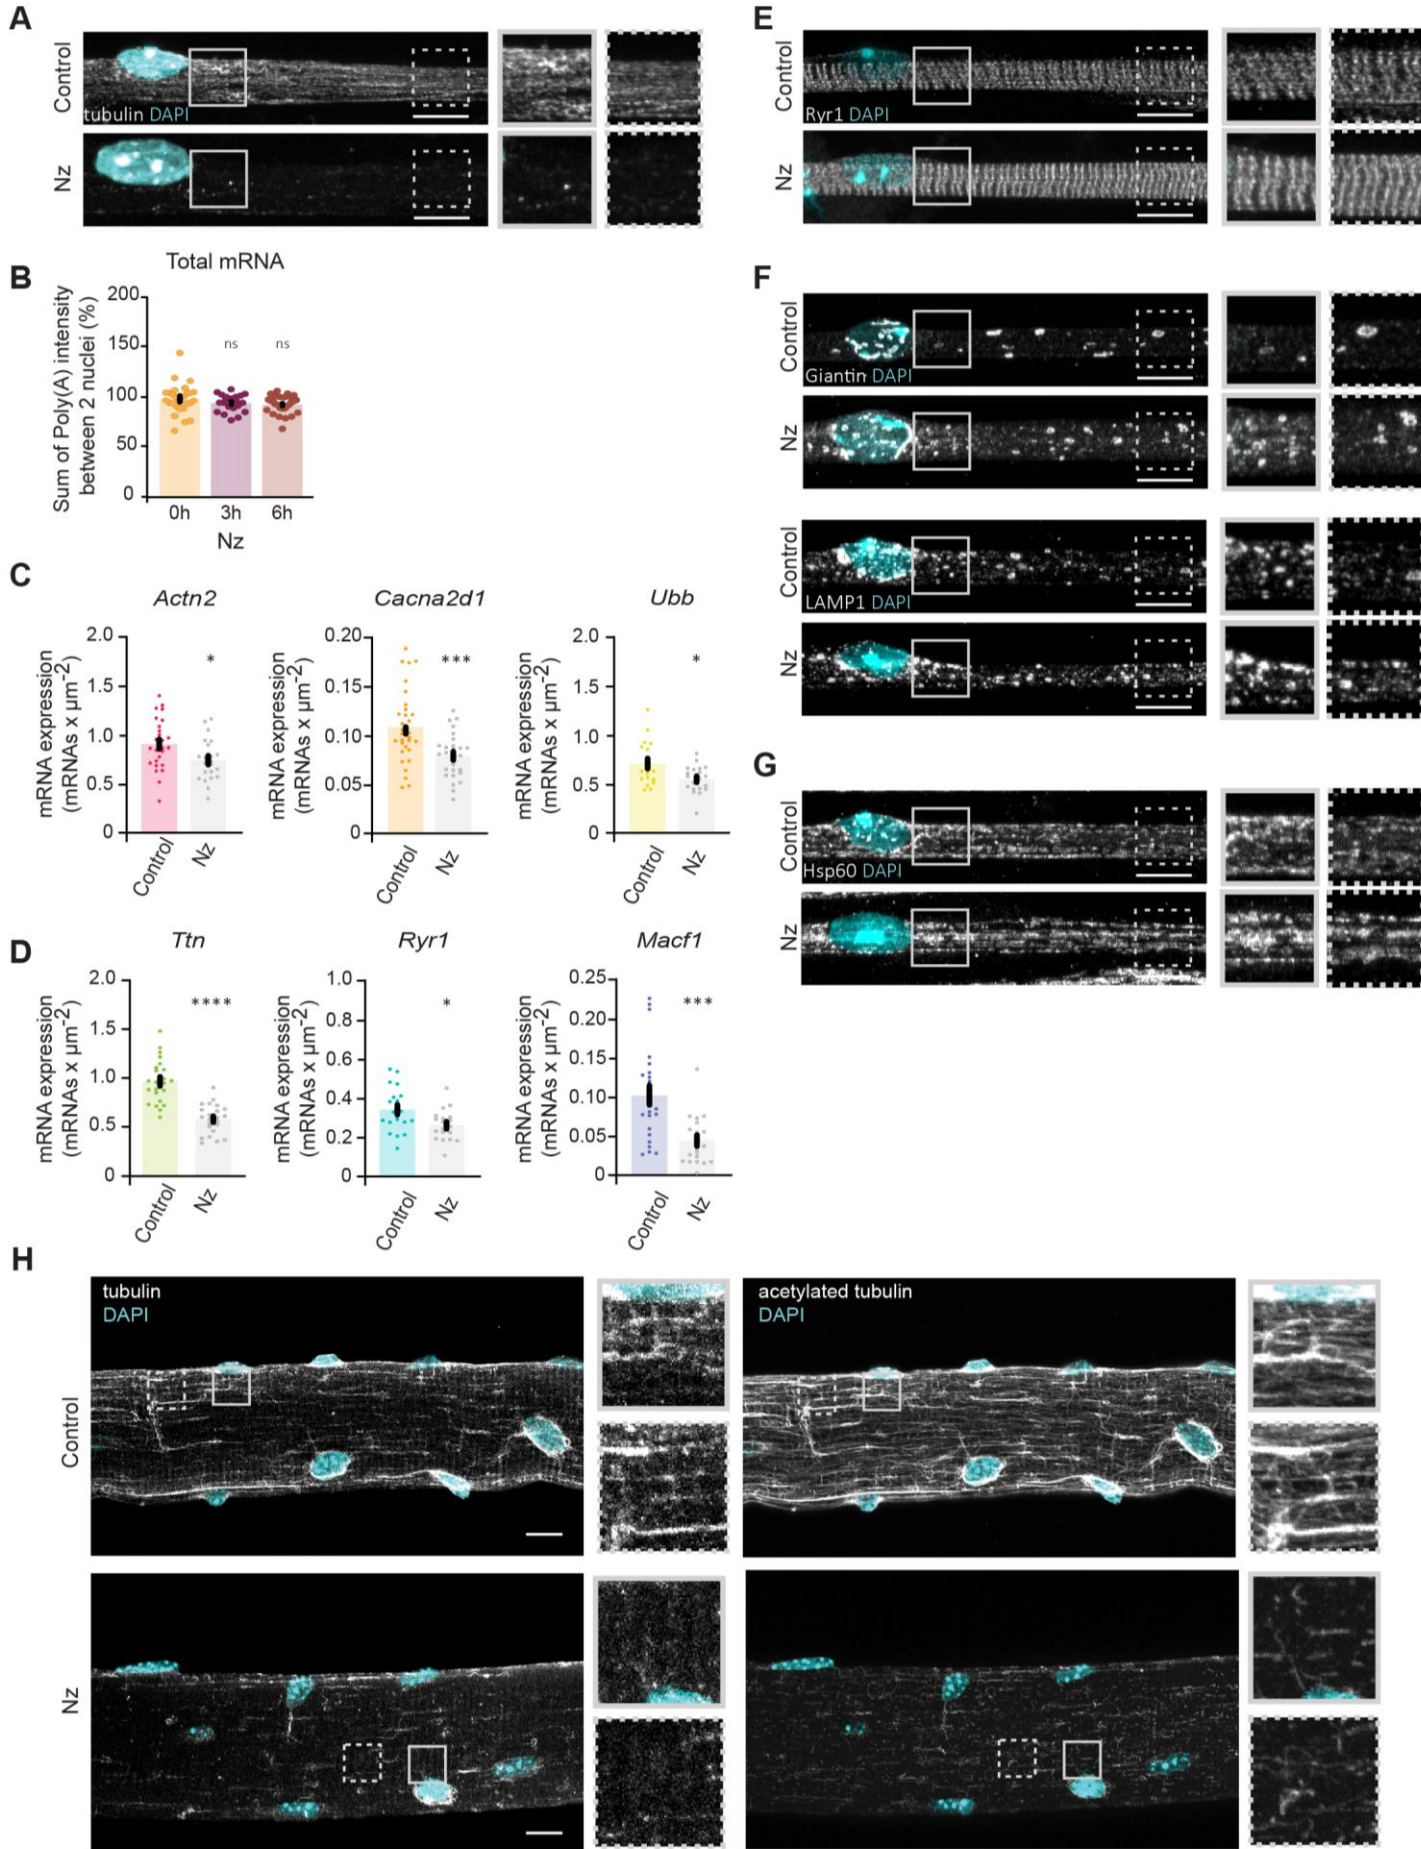

**Fig. S5.** Relative to Figs 5 and 6. (A) Representative image of microtubules in control and myofibers treated with nocodazole for 6h stained for tubulin. 1.5x magnification of the highlighted region on the right. (B) Quantification of total poly(A) mRNA intensity in segments between two adjacent nuclei in myofibers treated for 3h and 6h with nocodazole. Mean  $\pm$  SEM of 21-28 cells from 3 independent experiments. (C) Quantification of *Actn2*, *Cacna2d1* and *Ubb* mRNA amount measured as number of mRNAs  $\mu\text{m}^2$  by smFISH in segments of myofibers between two adjacent nuclei in control and nocodazole-treated myofibers. Mean  $\pm$  SEM of 27 and 22 (*Actn2*), 31 and 29 (*Cacna2d1*) and 19 and 20 (*Ubb*) cells from 3 independent experiments. (D) Quantification of *Ttn*, *Ryr1* and *Macf1* mRNA amount measured as number of mRNAs  $\mu\text{m}^2$  by smFISH in segments of myofibers between two adjacent nuclei in control and nocodazole-treated myofibers. Mean  $\pm$  SEM of 23 and 23 (*Ttn*), 21 and 19 (*Ryr1*) and 24 and 20 (*Macf1*) cells from 3 independent experiments. (E-G) Representative images of (E) sarcoplasmic reticulum (Ryr1), (F) golgi (Giantin) and lysosomes/late-endosomes (LAMP1) and (G) mitochondria (Hsp60) in control and nocodazole-treated myofibers. (H) Representative image of microtubules in control and isolated fiber treated with nocodazole for 9h, stained for detyrosinated and acetylated tubulin. 3x magnification of the highlighted regions on the right. (ns  $p > 0.05$ , \* $p < 0.05$ , \*\*\* $p < 0.001$ , \*\*\*\* $p < 0.0001$ . One-way ANOVA with Tukey's multiple comparisons test and student's *t* test for comparisons between 2 experimental conditions. 95% confidence interval. Images are maximum intensity projections. Scale bars: 10  $\mu\text{m}$ .)



**Table S1. Summary table of the main characteristics of the cohort of transcripts analyzed and their encoded proteins.** Predictive mRNA sizes were obtained from the National Center for Biotechnology Information (NCBI) database and correspond to the longer isoform. Protein mass was estimated using the formula: Weight (kDa) = number of aminoacids x 110 / 1000.

| mRNA            | PEI ± SEM   | Expression ± SEM (mRNA.µm <sup>-2</sup> ) | Size (bp) | NCBI accession | Protein                                              | Weight (kDa) | Type | Function /Localization | Muscle specific |
|-----------------|-------------|-------------------------------------------|-----------|----------------|------------------------------------------------------|--------------|------|------------------------|-----------------|
| <i>Dag1</i>     | 19.63 ± 2.6 | 2.6 ± 0.15                                | 5591      | NM_010017.4    | Dystroglycan                                         | 98           | TM   | Sarcolemma             | No              |
| <i>Scn4a</i>    | 18.99 ± 3.1 | 3.1 ± 0.04                                | 6598      | NM_133199.2    | Sodium channel protein type 4 subunit alpha          | 202          | TM   | Triads                 | Yes             |
| <i>Ubb</i>      | 15.48 ± 1.4 | 1.4 ± 1.97                                | 1513      | NM_011664.4    | Ubiquitin B                                          | 34           | Cyt  | Protein degradation    | No              |
| <i>Jph1</i>     | 13.28 ± 2.1 | 2.1 ± 0.07                                | 4809      | NM_020604.2    | Junctophilin-1                                       | 73           | TM   | Triads                 | Yes             |
| <i>Finc</i>     | 13.06 ± 3.1 | 3.1 ± 0.37                                | 9167      | NM_001081185.2 | Filamin-C                                            | 300          | Cyt  | Sarcolemma             | Yes             |
| <i>Hspb1</i>    | 12.66 ± 1.5 | 1.5 ± 0.49                                | 913       | NM_013560.2    | Heat shock protein beta-1                            | 23           | Cyt  | Stress response        | No              |
| <i>Cacna1s</i>  | 10.81 ± 1.9 | 1.9 ± 0.09                                | 6341      | NM_001081023.2 | Calcium Voltage-Gated Channel Subunit α1S            | 204          | TM   | T-Tubule               | Yes             |
| <i>Cacnb1</i>   | 10.09 ± 1.2 | 1.2 ± 0.08                                | 3524      | NM_001282977.1 | Calcium Voltage-Gated Channel Auxiliary Subunit β1   | 71           | Cyt  | T-Tubule               | Yes             |
| <i>Cacna2d1</i> | 9.55 ± 2.5  | 2.5 ± 0.10                                | 7472      | NM_001110843.1 | Calcium Voltage-Gated Channel Auxiliary Subunit α2δ1 | 121          | TM   | T-Tubule               | Yes             |
| <i>Gapdh</i>    | 6.47 ± 1.1  | 1.1 ± 1.40                                | 1296      | NM_001289726.1 | Glyceraldehyde 3-phosphate Dehydrogenase             | 40           | Cyt  | Glycolysis             | No              |
| <i>Actn2</i>    | 5.25 ± 1.0  | 1.0 ± 0.79                                | 3091      | NM_033268.4    | α-actinin 2                                          | 98           | Cyt  | Sarcomere              | Yes             |
| <i>Obscn</i>    | 3.17 ± 2.7  | 2.7 ± 0.04                                | 24175     | NM_001171512.2 | Obscurin                                             | 884          | Cyt  | Sarcomere              | Yes             |
| <i>Ubr4</i>     | 3.08 ± 1.4  | 1.4 ± 0.04                                | 15901     | NM_001160319.1 | E3 ubiquitin-protein ligase UBR4                     | 570          | Cyt  | Protein degradation    | No              |
| <i>Myh10</i>    | 2.91 ± 3.4  | 3.4 ± 0.02                                | 7783      | NM_175260.2    | Myosin-10                                            | 217          | Cyt  | Cytoskeleton           | No              |
| <i>Macf1</i>    | 2.39 ± 1.1  | 1.1 ± 0.12                                | 23495     | NM_001199136   | Microtubule actin crosslinking factor 1              | 809          | Cyt  | Cytoskeleton           | No              |
| <i>Dync1h1</i>  | 2.04 ± 2.0  | 2.0 ± 0.05                                | 14398     | NM_030238.2    | Cytoplasmic dynein 1 heavy chain 1                   | 511          | Cyt  | Cytoskeleton           | No              |
| <i>Ttn</i>      | 1.63 ± 0.7  | 0.7 ± 0.92                                | 101674    | NM_011652.3    | Titin                                                | 3681         | Cyt  | Sarcomere              | Yes             |
| <i>Utrn</i>     | 1.59 ± 2.5  | 2.5 ± 0.03                                | 12382     | NM_011682.4    | Utrophin                                             | 42           | Cyt  | Costamere              | No              |
| <i>Ryr1</i>     | 0.74 ± 1.7  | 1.7 ± 0.20                                | 15362     | NM_009109.2    | Ryanodine receptor 1                                 | 554          | TM   | Sarcoplasmic Reticulum | Yes             |
| <i>Dmd</i>      | -1.41 ± 1.3 | 1.3 ± 0.06                                | 13852     | NM_007868.6    | Dystrophin                                           | 404          | Cyt  | Costamere              | Yes             |
| <i>Dst</i>      | -1.52 ± 1.3 | 1.3 ± 0.09                                | 24271     | NM_001276764.1 | Dystonin                                             | 849          | Cyt  | Cytoskeleton           | No              |
| <i>Neb</i>      | -3.04 ± 0.7 | 0.7 ± 0.72                                | 22489     | NM_010889.1    | Nebulin                                              | 787          | Cyt  | Sarcomere              | Yes             |
| <i>Akap9</i>    | -3.21 ± 3.4 | 3.4 ± 0.02                                | 12105     | NM_194462.2    | A-kinase anchor protein 9                            | 416          | Cyt  | MT nucleation          | No              |

**Table S2. smFISH probe sequences (5' to 3').**

[Click here to download Table S2](#)
